# Supplementary material
Source: PubMed Central journal article supplement (PMC2740400)
Supplement: 00200.2009_1.pdf [file 00200.2009_1.pdf]

**Figure S1. The Etd uptake rate of HeLa Cx32 cells in DCFS shows a tendency to inhibition after treatment with an antimycin A concentration known to induce metabolic inhibition.** (A) Representative plot obtained from time-lapse experiments of Etd uptake in HeLa-Cx32 cells. Cells were maintained under control conditions for the first 12.5 min. Then, they were exposed to DCFS followed by exposure to antimycine A (5 ng/ml) in DFCS. Each point corresponds to the average of 15 cells  $\pm$  SEM. (B) Bar graph showing the mean rates of Etd uptake obtained from experiments performed as in (A) (n = 3 experiments).

**Figure S2. Inhibition of p38-MAP kinase partially prevents the increase of Etd uptake induced by MI.** Rates of Etd uptake obtained from subconfluent HeLa-Cx32 cells cultures, pre-incubated for 1 h with DMSO (0.01%, Pre-veh), or the inhibitor of the p38-MAPK SB203519 (10  $\mu$ M, Pre-SB203519). Each bar is the average  $\pm$  SEM. n = 4 experiments. In each experiment, 20 cells were analyzed. \*\* p <0.05, rated by t-test.
